**Table S7: Summary of genome assembly of seven sequenced teleost species**

| Species                       | Total length of scaffolds (bp) | Total length of contigs (bp) | Percentage of gaps | N50 of scaffolds (bp) | N50 of contigs (bp) | Number of scaffolds | Number of contigs |
|-------------------------------|--------------------------------|------------------------------|--------------------|-----------------------|---------------------|---------------------|-------------------|
| <i>Larimichthys crocea</i>    | 678,964,076                    | 661,327,267                  | 2.60%              | 1,034,540             | 63,110              | 6,019               | 27,015            |
| <i>Gadus morhua</i>           | 832,114,588                    | 607,869,276                  | 26.95%             | 136,353               | 2,310               | 398,859             | 555,245           |
| <i>Takifugu rubripes</i>      | 393,312,790                    | 351,017,437                  | 10.75%             | 858,115               | 49,304              | 7,214               | 33,204            |
| <i>Oryzias latipes</i>        | 869,000,216                    | 700,384,697                  | 19.40%             | 29,908,082            | 9,628               | 7,189               | 134,399           |
| <i>Tetraodon nigroviridis</i> | 358,618,246                    | 302,293,082                  | 15.71%             | 13,390,619            | 30,260              | 27                  | 33,235            |
| <i>Gasterosteus aculeatus</i> | 461,533,321                    | 446,627,734                  | 3.23%              | 18,115,788            | 83,204              | 1,842               | 16,966            |
| <i>Danio rerio</i>            | 1,412,464,843                  | 1,409,741,015                | 0.19%              | 54,093,808            | 1,073,451           | 1,133               | 28,972            |

Assemblies of six other teleost species are downloaded from Ensemble74. Since *Oryzias latipes*, *Tetraodon nigroviridis*, *Gasterosteus aculeatus*, and *Danio rerio* were anchored to chromosomes (Shadowed background), their scaffold N50 is larger than 10 Mb.
