# Supplementary material for: Genome Sequencing of the Perciform Fish Larimichthys crocea Provides Insights into Molecular and Genetic Mechanisms of Stress Adaptation
Source: PLOS journal article supplement (doi:10.1371/journal.pgen.1005118), 2015-04-02

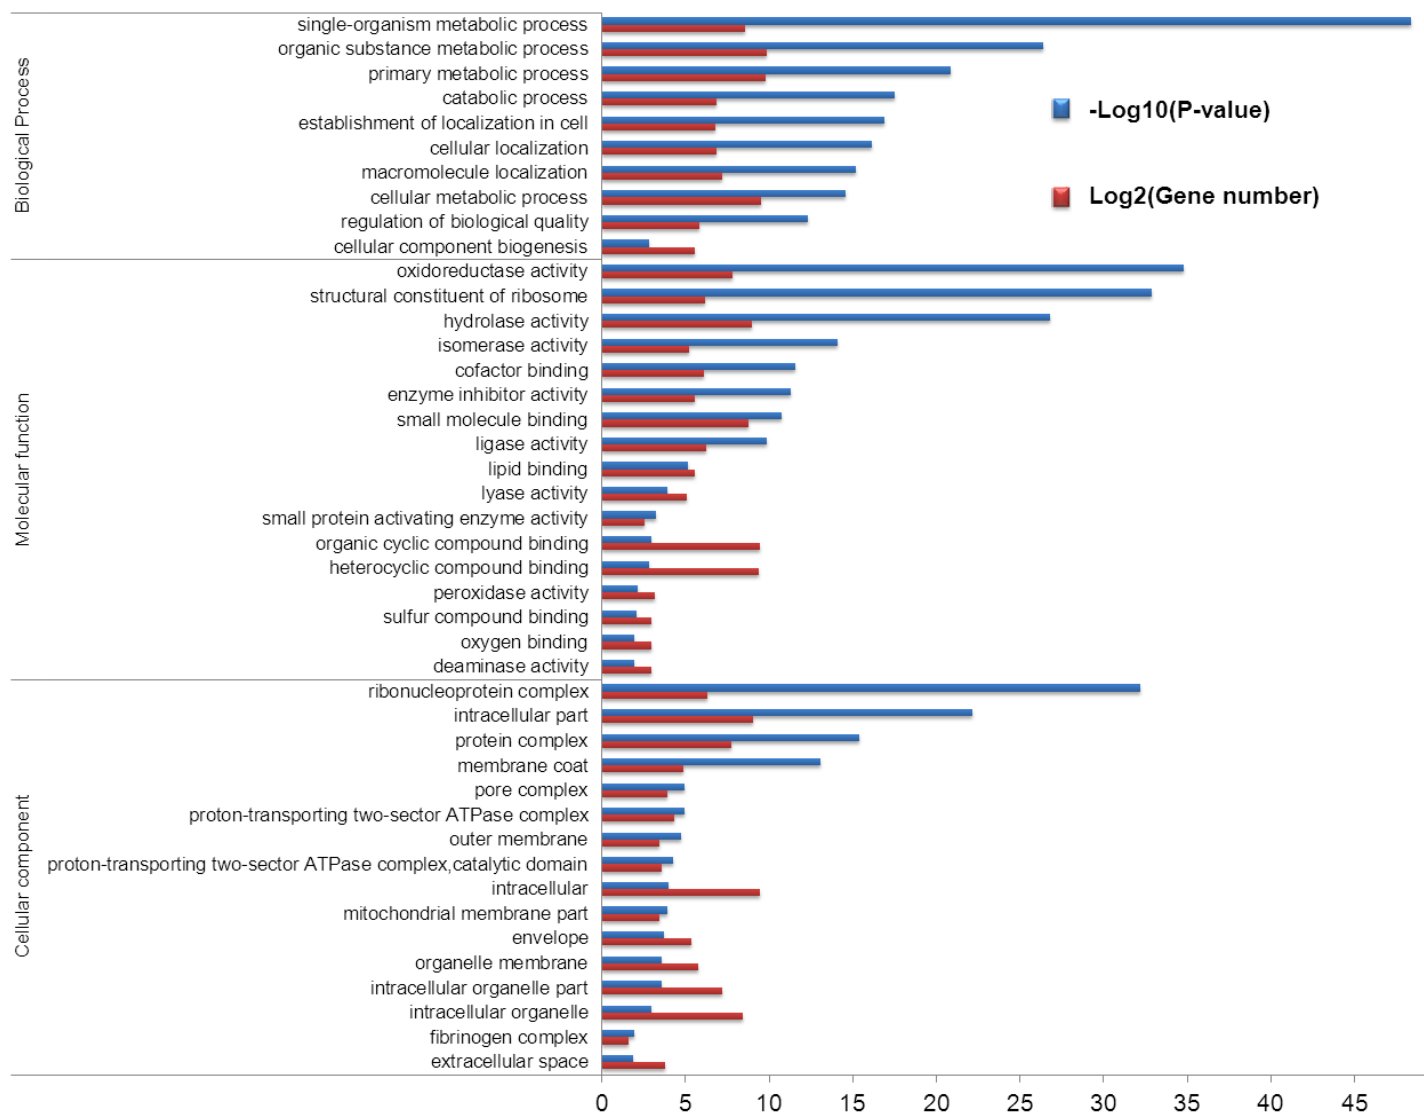

Supplement: S18 (10.1371/journal.pgen.1005118.s018) [file journal.pgen.1005118.s018]
