# Supplementary material for: Genome Sequencing of the Perciform Fish Larimichthys crocea Provides Insights into Molecular and Genetic Mechanisms of Stress Adaptation
Source: PLOS journal article supplement (doi:10.1371/journal.pgen.1005118), 2015-04-02
Supplement: S25 (10.1371/journal.pgen.1005118.s025) [file journal.pgen.1005118.s025]

**Table S6: Genome assembly validation by transcripts mapping**

|                       |                      | >0%Aligned               |                   | >%50 aligned             |                   | >%80 aligned             |                   |
|-----------------------|----------------------|--------------------------|-------------------|--------------------------|-------------------|--------------------------|-------------------|
| Transcripts<br>length | Total<br>transcripts | Number of<br>transcripts | Percentage<br>(%) | Number of<br>transcripts | Percentage<br>(%) | Number of<br>transcripts | Percentage<br>(%) |
| >500 bp               | 39,106               | 38,520                   | 98.50             | 38,174                   | 97.62             | 37,460                   | 95.79             |
| >1000 bp              | 18,184               | 17,966                   | 98.80             | 17,786                   | 97.81             | 17,421                   | 95.80             |

The male and female transcriptomes were from eleven mixed tissues respectively. Then the sequencing short reads were assembled to transcripts. Transcripts were mapped to *L. crocea* genome by BLAT to validate completeness of genome assembly.
