# Supplementary material for: Genome Sequencing of the Perciform Fish Larimichthys crocea Provides Insights into Molecular and Genetic Mechanisms of Stress Adaptation
Source: PLOS journal article supplement (doi:10.1371/journal.pgen.1005118), 2015-04-02
Supplement: S38 (10.1371/journal.pgen.1005118.s038) [file journal.pgen.1005118.s038]

**Table S19: Copy number of auditory sense-related genes in seven sequenced teleost species**

| Gene name       | <i>Larimichthys crocea</i> | <i>Danio rerio</i> | <i>Gadus morhua</i> | <i>Gasterosteus aculeatus</i> | <i>Oryzias latip</i> | <i>Takifugu rubripes</i> | <i>Tetraodon nigroviridis</i> |
|-----------------|----------------------------|--------------------|---------------------|-------------------------------|----------------------|--------------------------|-------------------------------|
| <i>OTOF</i>     | 5                          | 3                  | 1                   | 1                             | 1                    | 2                        | 0                             |
| <i>claudinj</i> | 24                         | 24                 | 15                  | 13                            | 18                   | 15                       | 15                            |
| <i>OTOL1</i>    | 11                         | 7                  | 5                   | 6                             | 8                    | 8                        | 5                             |

For good communication, fish have developed high sensitivities to environmental sound. Three important auditory genes, *OTOF*, *claudinj*, and *OTOL1*, were significantly expanded in the *L. crocea* genome ( $P < 0.01$ ). These expansions may contribute to the detection of sound signaling during communication, and thus to reproduction and survival. Genes are abbreviated as *OTOF*: otoferlin; *OTOL1*: otolin-1.

One more round of genome duplication occurred in *Danio rerio* relative to other fish species.
